# Supplementary material
Source: ML conference proceedings conference paper supplement (https://openaccess.thecvf.com/content/CVPR2023/html/Su_Language_Adaptive_Weight_CVPR_2023_paper.html)
Supplement: Supplementary file 1 [file Su_Language_Adaptive_Weight_CVPR_2023_supplemental.pdf]

# Language Adaptive Weight Generation for Multi-task Visual Grounding

## Supplementary Material

### A. Experiments on Swin Transformer

Apart from using ViT [3] as the visual backbone, we also conduct experiments on the Swin Transformer [8]. Following the settings reported by QRNet [14] and LAVT [13], we evaluate the proposed VG-LAW framework on Swin-S and Swin-B for REC and RES tasks, respectively. The main results are summarized to Tab. 1.

| Methods       | Visual Backbone | Multi-task | RefCOCO |       |       | RefCOCO+ |       |       | RefCOCOg |       | ReferItGame test |
|---------------|-----------------|------------|---------|-------|-------|----------|-------|-------|----------|-------|------------------|
|               |                 |            | val     | testA | testB | val      | testA | testB | val      | test  |                  |
| <b>REC:</b>   |                 |            |         |       |       |          |       |       |          |       |                  |
| RefTR [7]     | RN101           | ✓          | 82.23   | 85.59 | 76.57 | 71.58    | 75.96 | 62.16 | 69.41    | 69.40 | 71.42            |
| QRNet [14]    | Swin-S          | ✗          | 84.01   | 85.85 | 82.34 | 72.94    | 76.17 | 63.81 | 71.89    | 73.03 | 74.61            |
| <u>VG-LAW</u> | Swin-S          | ✗          | 84.82   | 87.22 | 81.94 | 74.36    | 78.49 | 65.24 | 75.61    | 76.28 | 74.83            |
| <u>VG-LAW</u> | Swin-S          | ✓          | 85.77   | 87.48 | 82.36 | 75.65    | 80.12 | 65.48 | 76.33    | 76.81 | 76.08            |
| <b>RES:</b>   |                 |            |         |       |       |          |       |       |          |       |                  |
| RefTR [7]     | RN101           | ✓          | 70.56   | 73.49 | 66.57 | 61.08    | 64.69 | 52.73 | 58.73    | 58.51 | -                |
| LAVT [13]     | Swin-B          | ✗          | 74.46   | 76.89 | 70.94 | 65.81    | 70.97 | 59.23 | 63.62    | 63.66 | -                |
| <u>VG-LAW</u> | Swin-B          | ✗          | 75.09   | 77.02 | 72.46 | 66.56    | 70.67 | 59.09 | 64.43    | 65.39 | -                |
| <u>VG-LAW</u> | Swin-B          | ✓          | 75.37   | 77.31 | 72.64 | 66.81    | 70.92 | 59.41 | 65.46    | 65.68 | -                |

Table 1. Comparison with state-of-the-art methods on RefCOCO [15], RefCOCO+ [15], RefCOCOg [10] and ReferItGame [5] for REC and RES tasks. RN101, Swin-S, and Swin-B are shorthand for the ResNet101, Swin-Transformer Small, and Swin-Transformer Base, respectively. We highlight the best and second best performance in the red and blue colors.

It can be observed that: (1) for the REC task, VG-LAW achieves the best performance on all four datasets when using the multi-task configuration, and the second-best performance except for the testB split on RefCOCO. Compared to the state-of-the-art REC method QRNet [14], which follows the TransVG [2] by using the transformer-based cross-modal interaction module and introduces extra multiscale fusion structures, ours VG-LAW is more compact and lightweight by just using a Swin backbone filled with expression-adaptive weights and a neat multi-task head. (2) For the RES task, VG-LAW achieves the best and second-best performance on RefCOCO and RefCOCOg datasets, and comparable performance on the RefCOCO+ dataset. Compared to the state-of-the-art RES method LAVT [13], which introduces the PWAM module based on the scaled dot-product attention and FPN-like decoder head, the VG-LAW is still compact and lightweight. The most obvious difference between VG-LAW and PWAM is that VG-LAW simply modifies the weights which are then used to extract expression-aware visual features, whereas PWAM incorporates linguistic features directly into the computation of the dot-product attention.

### B. Experiments on Large-scale Pre-training Datasets

To compare with the methods [1, 4, 9, 12] trained on large-scale datasets, we also build a large-scale pre-training dataset by collecting images and annotations from the train split of RefCOCO+/g, ReferItGame, Flickr30k Entities [11], and VG regions [6]. This dataset contains 174K images with nearly 6.1M referring expressions. We pre-train the models for 40 epochs with a batch size of 512, which are then fine-tuned on each specific dataset for 20 epochs with a batch size of 256. The pre-training results are summarized to Tab. 2.

### C. Comparison of FLOPs and Inference Time

We also evaluate the FLOPs using fvcare and inference time on one 1080Ti GPU. The results are summarized to Tab. 3.

| Method       | RefCOCO |       |       | RefCOCO+ |       |       | RefCOCOg |        |
|--------------|---------|-------|-------|----------|-------|-------|----------|--------|
|              | val     | testA | testB | val      | testA | testB | val-u    | test-u |
| ViLBERT [9]  | -       | -     | -     | 72.34    | 78.52 | 62.61 | -        | -      |
| VL-BERT [12] | -       | -     | -     | 72.59    | 78.57 | 62.30 | -        | -      |
| UNITER [1]   | 81.41   | 87.04 | 74.17 | 75.90    | 81.45 | 66.70 | 74.86    | 75.77  |
| MDETR [4]    | 87.51   | 90.40 | 82.67 | 81.13    | 85.52 | 72.96 | 83.35    | 83.31  |
| VG-LAW       | 89.27   | 91.63 | 86.46 | 81.56    | 85.77 | 74.10 | 83.56    | 84.37  |

Table 2. Comparison with large-scale pre-training SOTA methods.

| Method     | Multi-task | Visual Backbone | FLOPs(G) | Runtime(ms) |
|------------|------------|-----------------|----------|-------------|
| QRNet [14] | ✗          | Swin-S          | 81.9     | 64.7        |
| LAVT [13]  | ✗          | Swin-B          | 193      | 67.9        |
| VG-LAW     | ✗          | ViT-B           | 74.3     | 49.4        |
| VG-LAW     | ✓          | ViT-B           | 77.3     | 50.2        |

Table 3. Comparison of FLOPs and inference time.

## References

- [1] Yen-Chun Chen, Linjie Li, Licheng Yu, Ahmed El Kholy, Faisal Ahmed, Zhe Gan, Yu Cheng, and Jingjing Liu. Uniter: Universal image-text representation learning. In *ECCV*, pages 104–120, 2020. 1, 2
- [2] Jiajun Deng, Zhengyuan Yang, Tianlang Chen, Wengang Zhou, and Houqiang Li. Transvg: End-to-end visual grounding with transformers. In *ICCV*, pages 1769–1779, 2021. 1
- [3] Alexey Dosovitskiy, Lucas Beyer, Alexander Kolesnikov, Dirk Weissenborn, Xiaohua Zhai, Thomas Unterthiner, Mostafa Dehghani, Matthias Minderer, Georg Heigold, Sylvain Gelly, et al. An image is worth 16x16 words: Transformers for image recognition at scale. *arXiv preprint arXiv:2010.11929*, 2020. 1
- [4] Aishwarya Kamath, Mannat Singh, Yann LeCun, Gabriel Synnaeve, Ishan Misra, and Nicolas Carion. Mdetr-modulated detection for end-to-end multi-modal understanding. In *ICCV*, pages 1780–1790, 2021. 1, 2
- [5] Sahar Kazemzadeh, Vicente Ordonez, Mark Matten, and Tamara Berg. Referitgame: Referring to objects in photographs of natural scenes. In *EMNLP*, pages 787–798, 2014. 1
- [6] Ranjay Krishna, Yuke Zhu, Oliver Groth, Justin Johnson, Kenji Hata, Joshua Kravitz, Stephanie Chen, Yannis Kalantidis, Li-Jia Li, David A Shamma, et al. Visual genome: Connecting language and vision using crowdsourced dense image annotations. *IJCV*, 2017. 1
- [7] Muchen Li and Leonid Sigal. Referring transformer: A one-step approach to multi-task visual grounding. *NeurIPS*, 34:19652–19664, 2021. 1
- [8] Ze Liu, Yutong Lin, Yue Cao, Han Hu, Yixuan Wei, Zheng Zhang, Stephen Lin, and Baining Guo. Swin transformer: Hierarchical vision transformer using shifted windows. In *ICCV*, pages 10012–10022, 2021. 1
- [9] Jiasen Lu, Dhruv Batra, Devi Parikh, and Stefan Lee. Vlbnet: Pretraining task-agnostic visiolinguistic representations for vision-and-language tasks. *NeurIPS*, 32, 2019. 1, 2
- [10] Varun K Nagaraja, Vlad I Morariu, and Larry S Davis. Modeling context between objects for referring expression understanding. In *ECCV*, pages 792–807, 2016. 1
- [11] Bryan A Plummer, Liwei Wang, Chris M Cervantes, Juan C Caicedo, Julia Hockenmaier, and Svetlana Lazebnik. Flickr30k entities: Collecting region-to-phrase correspondences for richer image-to-sentence models. In *ICCV*, 2015. 1
- [12] Weijie Su, Xizhou Zhu, Yue Cao, Bin Li, Lewei Lu, Furu Wei, and Jifeng Dai. Vl-bert: Pre-training of generic visual-linguistic representations. *arXiv preprint arXiv:1908.08530*, 2019. 1, 2
- [13] Zhao Yang, Jiaqi Wang, Yansong Tang, Kai Chen, Hengshuang Zhao, and Philip HS Torr. Lavt: Language-aware vision transformer for referring image segmentation. In *CVPR*, pages 18155–18165, 2022. 1, 2
- [14] Jiabo Ye, Junfeng Tian, Ming Yan, Xiaoshan Yang, Xuwu Wang, Ji Zhang, Liang He, and Xin Lin. Shifting more attention to visual backbone: Query-modulated refinement networks for end-to-end visual grounding. In *CVPR*, pages 15502–15512, 2022. 1, 2
- [15] Licheng Yu, Patrick Poirson, Shan Yang, Alexander C Berg, and Tamara L Berg. Modeling context in referring expressions. In *ECCV*, pages 69–85, 2016. 1
